# Supplementary material
Source: MDPI journal article supplement (https://www.mdpi.com/2673-4591/9/1/42)
Supplement: s1 [file s1]

## Crop Water Availability Mapping in the Danube Basin Based on Deep Learning, Hydrological and Crop Growth Modelling

### Document Changes:

- Added post code for Trento: I-38123
- Added accessed date 05/01/2022 to website URLs: <https://foodsecurity-tep.net/>, <https://www.hopsworks.ai>, <https://cds.climate.copernicus.eu/>, <https://rslab.disi.unitn.it/timesen2crop/>
- In Section 2.2. changed „the whole Austrian territory” to “the whole Austrian cultivated area”
- Revised hyphen into dash in figures 2 and 3
